# Supplementary material
Source: Springer Nature journal article supplement (https://www.springermedizin.de/resource/supplementary/12997_2005_10_MOESM3_ESM.pdf/9623078)

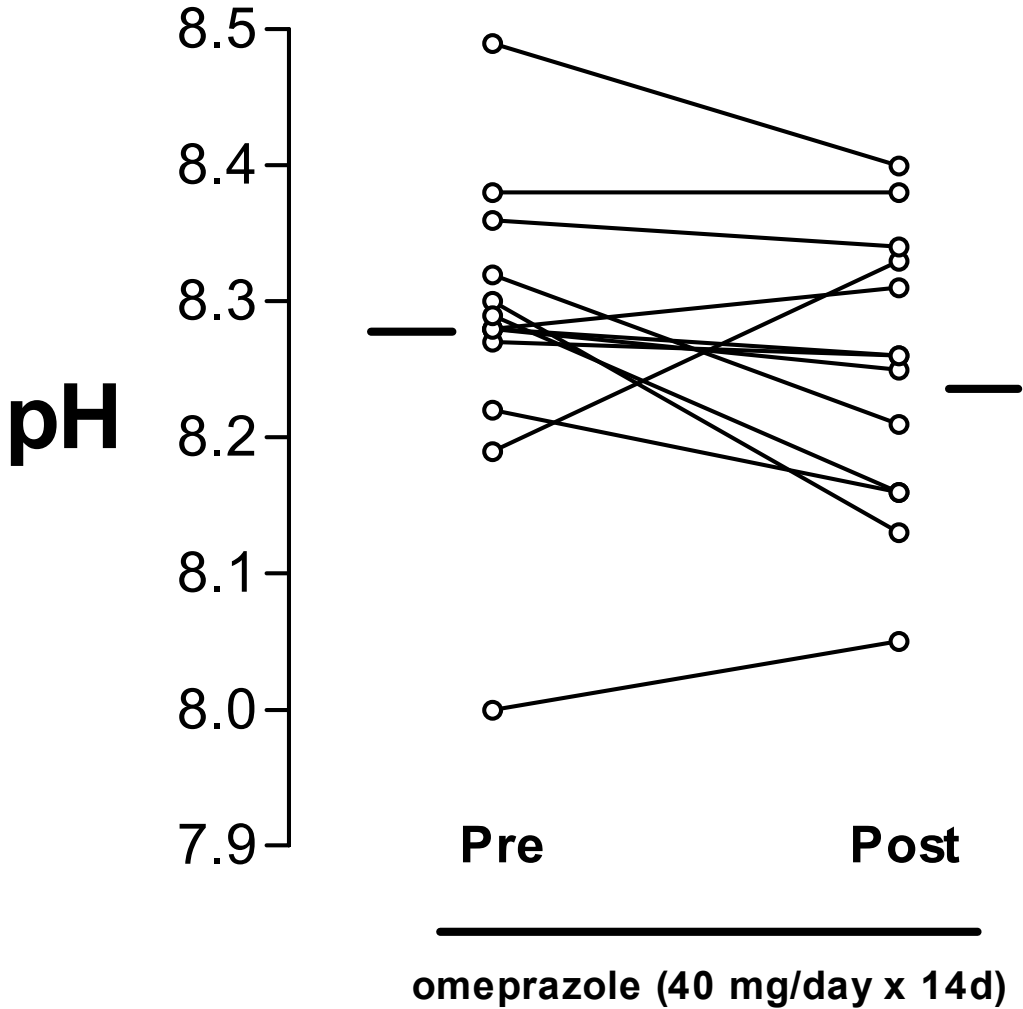

Supplement: MOESM3 [file 9623078]
